# Supplementary material for: Phase-dependent electrocatalytic activity of colloidally synthesized WP and α-WP2 electrocatalysts for hydrogen evolution reaction
Source: Royal Society of Chemistry journal article supplement (doi:10.1039/d1nj00927c), 2021-01-01
Supplement: d1nj00927c1.pdf [file d1nj00927c1.pdf]

# Phase-dependant electrocatalytic activity of colloidally synthesized WP and $\alpha$ -WP<sub>2</sub> electrocatalysts for hydrogen evolution reaction

Siyabonga S. Nkabinde<sup>1</sup>, Patrick V. Mwonga<sup>1</sup>, Siyasanga Mpelane<sup>2</sup>, Zakhele B. Ndala<sup>1</sup>,  
Tshwarela Kolokoto<sup>1</sup>, Ndivhuwo P. Shumbula<sup>1</sup>, Obakeng Nchoe<sup>1</sup>, Rapela R. Maphanga<sup>3</sup>,  
Kenneth I. Ozoemena<sup>1</sup>, Kalenga P. Mubiayi<sup>1,4</sup> and Nosipho Moloto<sup>1\*</sup>

<sup>1</sup>*Molecular Sciences Institute, School of Chemistry, University of the Witwatersrand, Private  
Bag 3, Wits 2050, South Africa*

<sup>2</sup>*Department of Chemistry, Johannesburg University, Johannesburg, 2006, South Africa*

<sup>3</sup>*Next Generation Enterprises and Institutions, Council for Scientific and Industrial Research  
(CSIR), P. O. Box 395, Pretoria 0001, South Africa*

<sup>4</sup>*DSI/NRF Centre of Excellence in Strong Materials, University of the Witwatersrand, Private  
Bag 3, Wits 2050, South Africa*

\*Corresponding author: Nosipho Moloto

Email: Nosipho.Moloto@wits.ac.za

Tel: +2711 7176774

Fax: +2711 7176749

## ADDITIONAL SUPPORTING INFORMATION

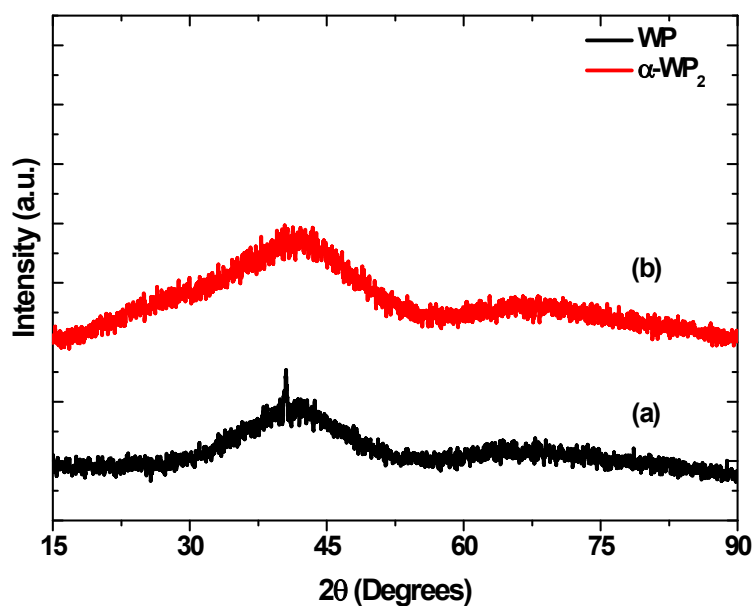

Figure S1: X-ray diffraction pattern of as synthesized (a) WP and (b)  $\alpha$ -WP<sub>2</sub>.

Calculations of the interplanar spacing from the XRD results:

**WP (011)**

$$2\theta = 31.115$$

$$\theta = 15.5575, \lambda = 0.15460 \text{ nm}$$

$$\lambda = 2d\sin\theta$$

$$d = 0.15406 \text{ nm} / 2\sin\theta = 0.2871 \text{ nm}$$

**A-WP<sub>2</sub> (-201)**

$$2\theta = 20.971$$

$$\theta = 10.4855, \lambda = 0.15460 \text{ nm}$$

$$\lambda = 2d\sin\theta$$

$$d = 0.15406 \text{ nm} / 2\sin\theta = 0.4231 \text{ nm}$$

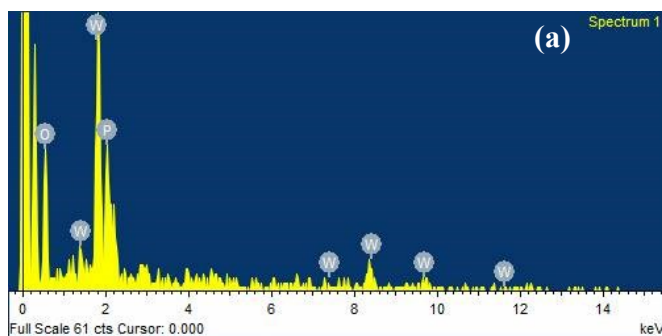

| Element | Atomic % |
|---------|----------|
| O       | 76.82    |
| P       | 12.39    |
| W       | 10.79    |

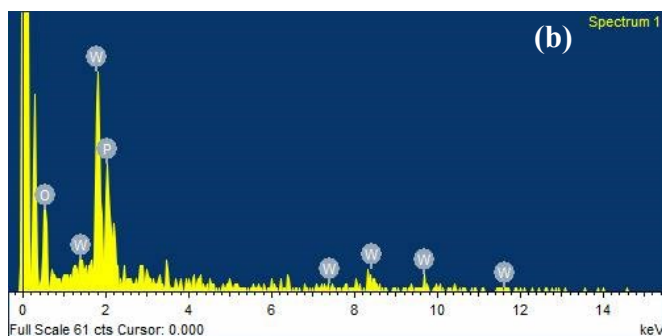

| Element | Atomic % |
|---------|----------|
| O       | 70.86    |
| P       | 17.36    |
| W       | 11.78    |

Figure S2: EDX spectra and corresponding atomic % of (a) WP and (b)  $\alpha$ -WP<sub>2</sub>.

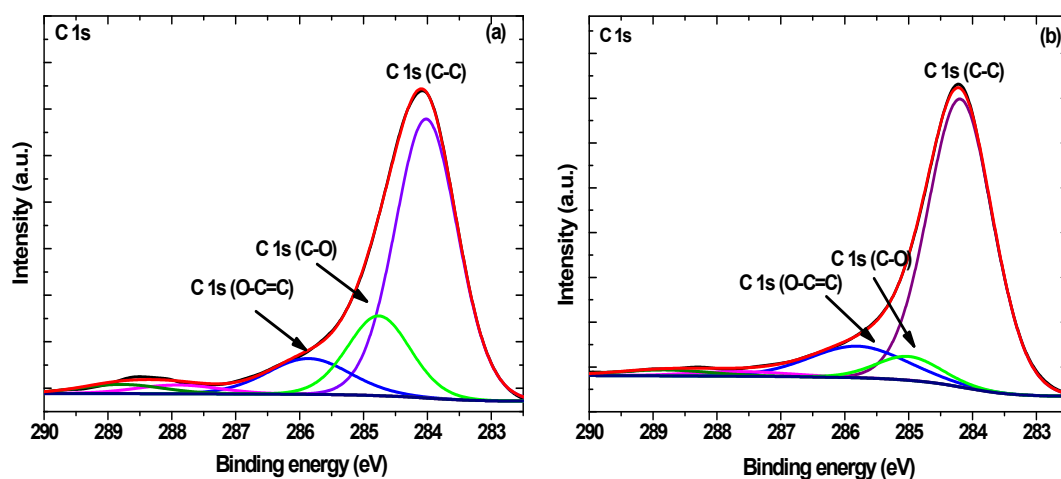

Figure S3: The C 1s spectrum of (a) WP and (b)  $\alpha$ -WP<sub>2</sub>.

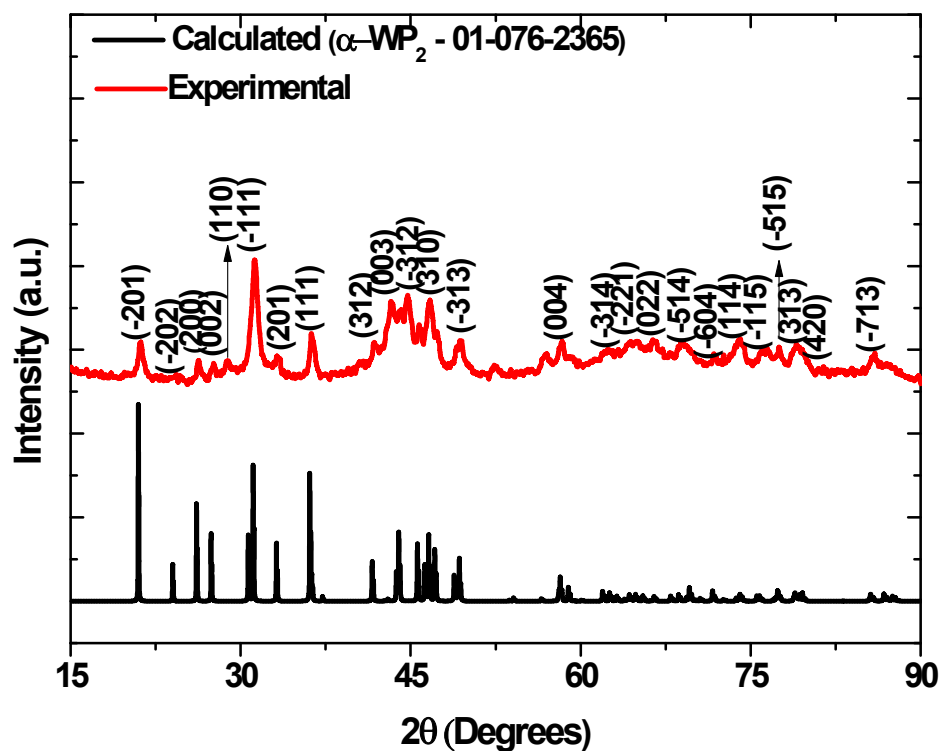

Figure S4: XRD pattern of long term stored  $\alpha$ -WP<sub>2</sub>.

Table S1: : Comparison of the electrocatalytic activity of WP and  $\alpha$ -WP<sub>2</sub> catalysts

| Catalyst                  | Tafel Slope<br>(mV dec <sup>-1</sup> ) | Overpotential<br>(10 mA cm <sup>-2</sup> ) | Exchange<br>current density<br>(mA cm <sup>-2</sup> ) | Onset potential<br>(mV) |
|---------------------------|----------------------------------------|--------------------------------------------|-------------------------------------------------------|-------------------------|
| WP                        | 95.71                                  | 314                                        | 0.004239                                              | 145                     |
| $\alpha$ -WP <sub>2</sub> | 86.83                                  | 271                                        | 0.004536                                              | 106                     |

**Table S2: Kinetic parameters of WP and  $\alpha$ -WP<sub>2</sub> catalysts**

| Catalyst                  | T(K) | $\beta$ (mV/dec) | $J_0$ (mAcm <sup>-2</sup> ) | $E_a$ (kJ/mol) |
|---------------------------|------|------------------|-----------------------------|----------------|
| WP                        | 298  | 95.71            | 0.004239                    | 44.24          |
|                           | 308  | 92.58            | 0.006973                    |                |
|                           | 318  | 87.34            | 0.01136                     |                |
|                           | 328  | 84.59            | 0.01316                     |                |
| $\alpha$ -WP <sub>2</sub> | 298  | 86.83            | 0.004536                    | 31.79          |
|                           | 308  | 84.86            | 0.009468                    |                |
|                           | 318  | 82.72            | 0.01023                     |                |
|                           | 328  | 80.25            | 0.02410                     |                |

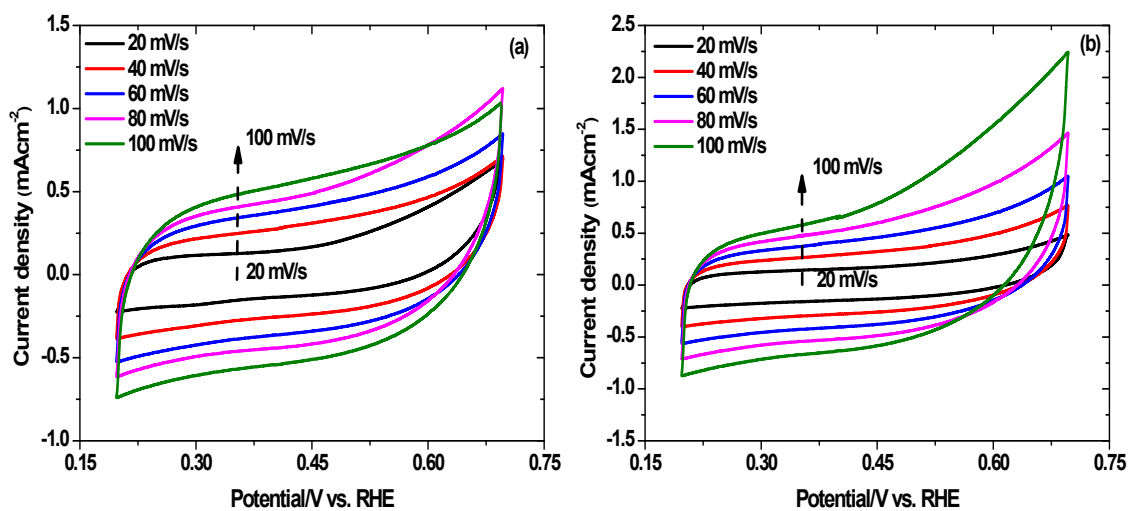

**Figure S5: Cyclic Voltammetry (CV) curves of (a) WP and (b)  $\alpha$ -WP<sub>2</sub> catalysts measured in a potential window without faradaic processes in 0.5 M H<sub>2</sub>SO<sub>4</sub> at scan rate from 20 - 100 mV s<sup>-1</sup>.**

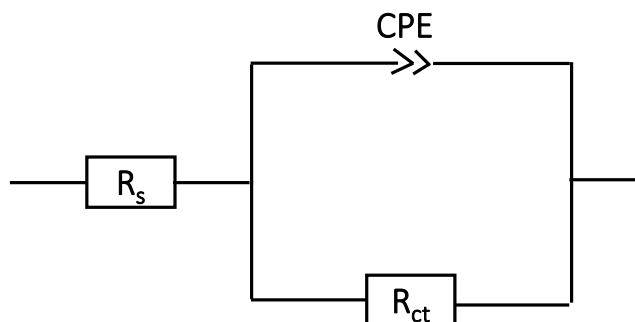

Figure S6: Equivalent circuit for one time constant, where  $R_s$  - solution resistant; CPE - constant phase element;  $R_{ct}$  – charge transfer resistance.

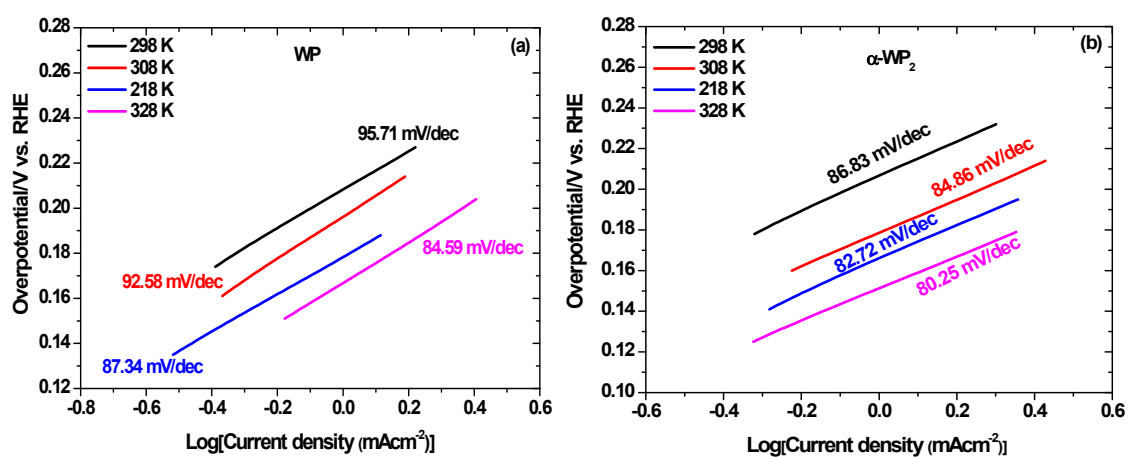

Figure S7: Tafel slopes of (a) WP and (b)  $\alpha$ -WP<sub>2</sub> catalysts obtained at different temperatures.

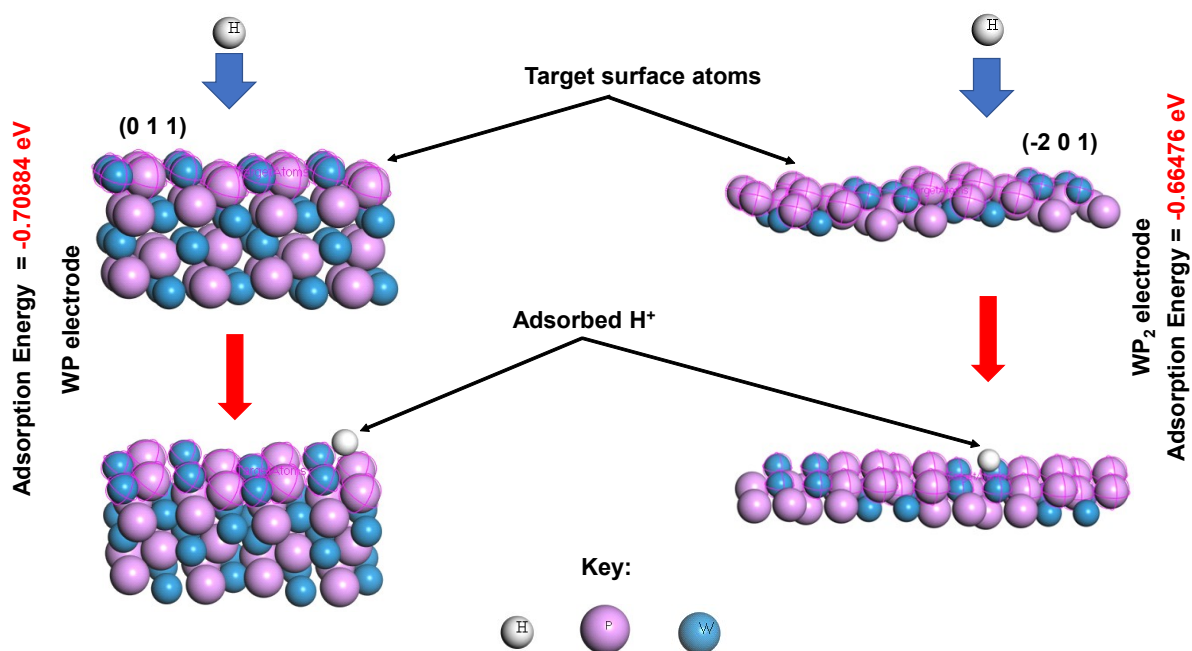

**Figure S8:** Calculated hydrogen adsorption energies on (011) and (-201) surfaces for WP and  $\alpha$ -WP<sub>2</sub>, respectively.

**Table S3:** Calculated adsorption energy using various layer planes of WP and  $\alpha$ -WP<sub>2</sub>.

| No. of Layers | Adsorption Energy (eV) | Adsorption Energy (eV)        |
|---------------|------------------------|-------------------------------|
|               | (WP)                   | ( $\alpha$ -WP <sub>2</sub> ) |
| 1             | -0.729952595           | -0.690267678                  |
| 2             | -0.74541264            | -0.717309001                  |
| 3             | -0.778989849           | -0.720332384                  |
| 4             | -0.788683415           | -0.720761754                  |

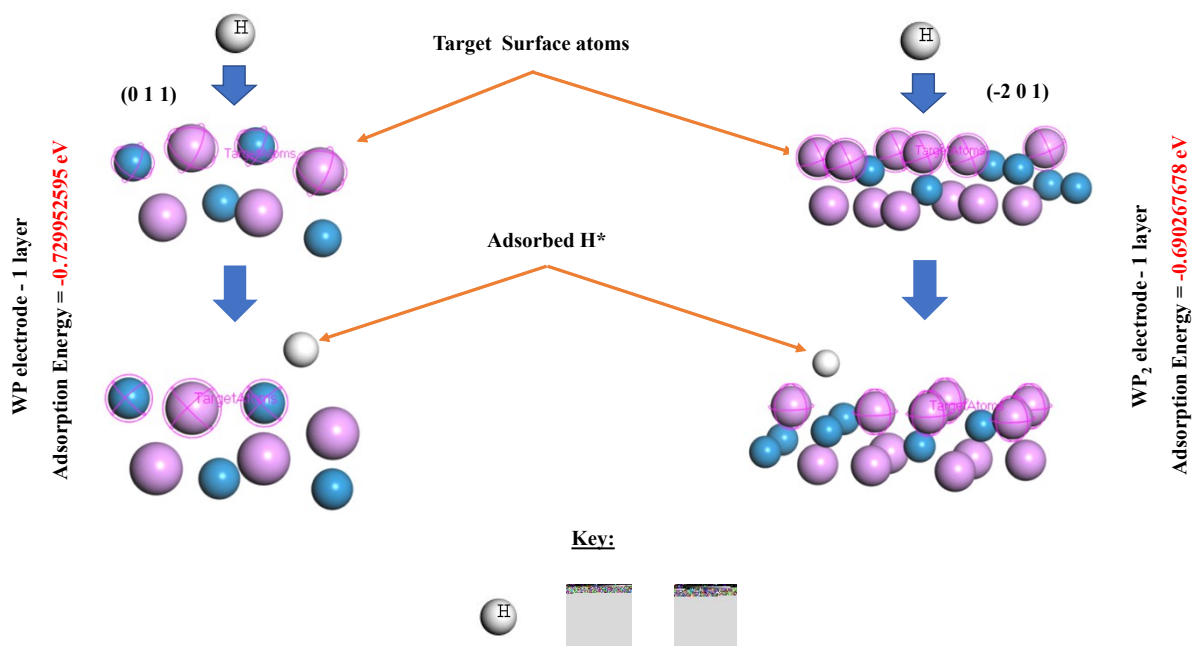

Figure S9: Calculated hydrogen adsorption energies for WP and  $\alpha$ -WP<sub>2</sub> using 1-layer.

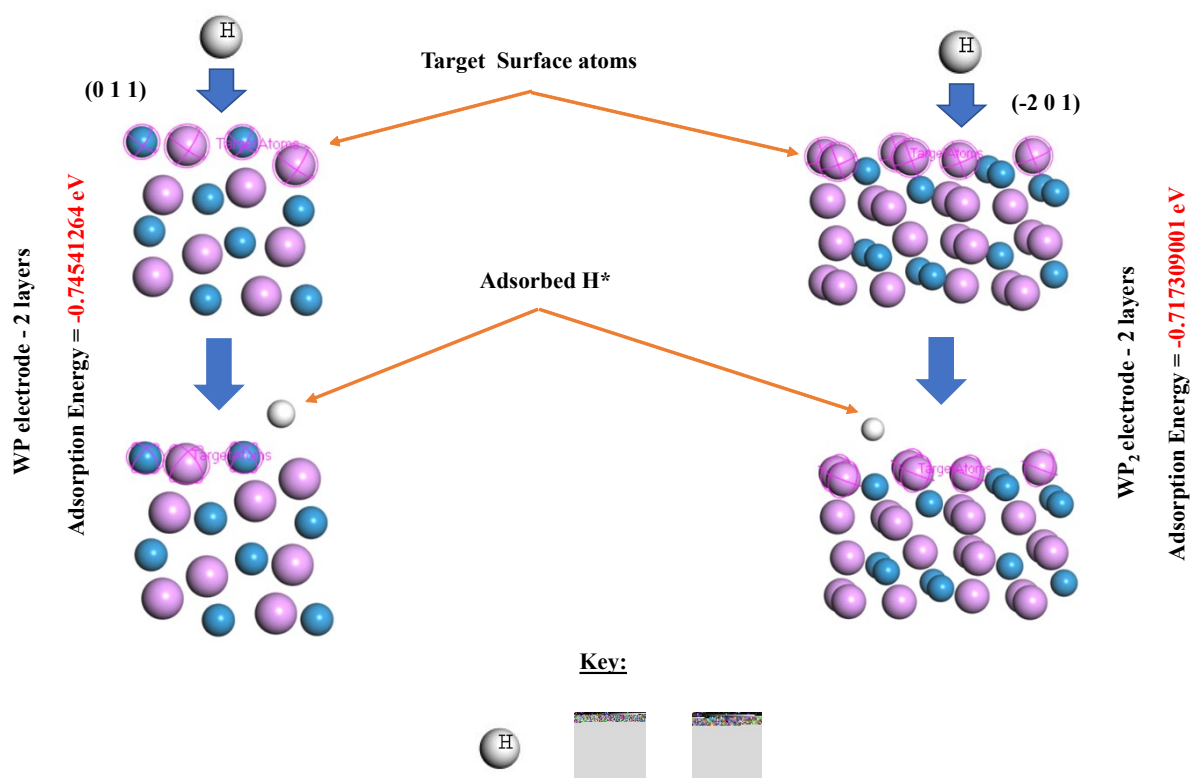

Figure S10: Calculated hydrogen adsorption energies for WP and  $\alpha$ -WP<sub>2</sub> using 2-layers.



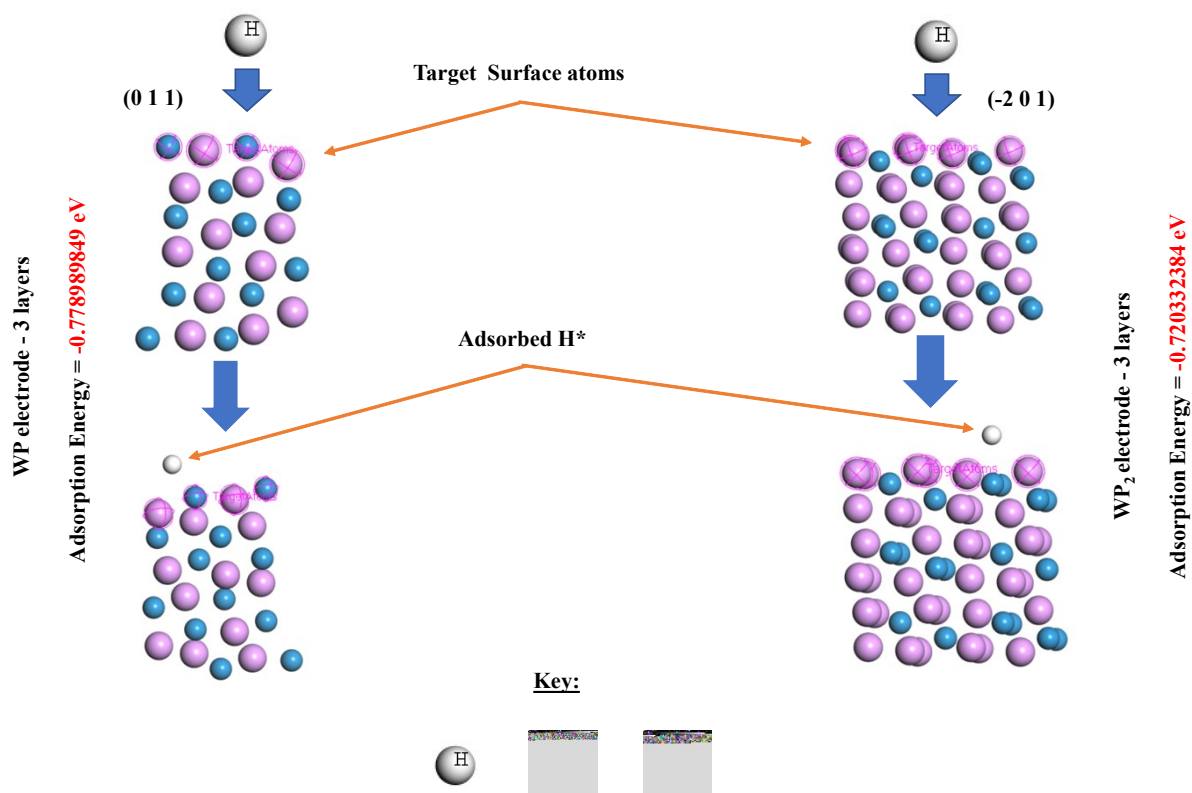

Figure S11: Calculated hydrogen adsorption energies for WP and  $\alpha$ -WP<sub>2</sub> using 3-layers.

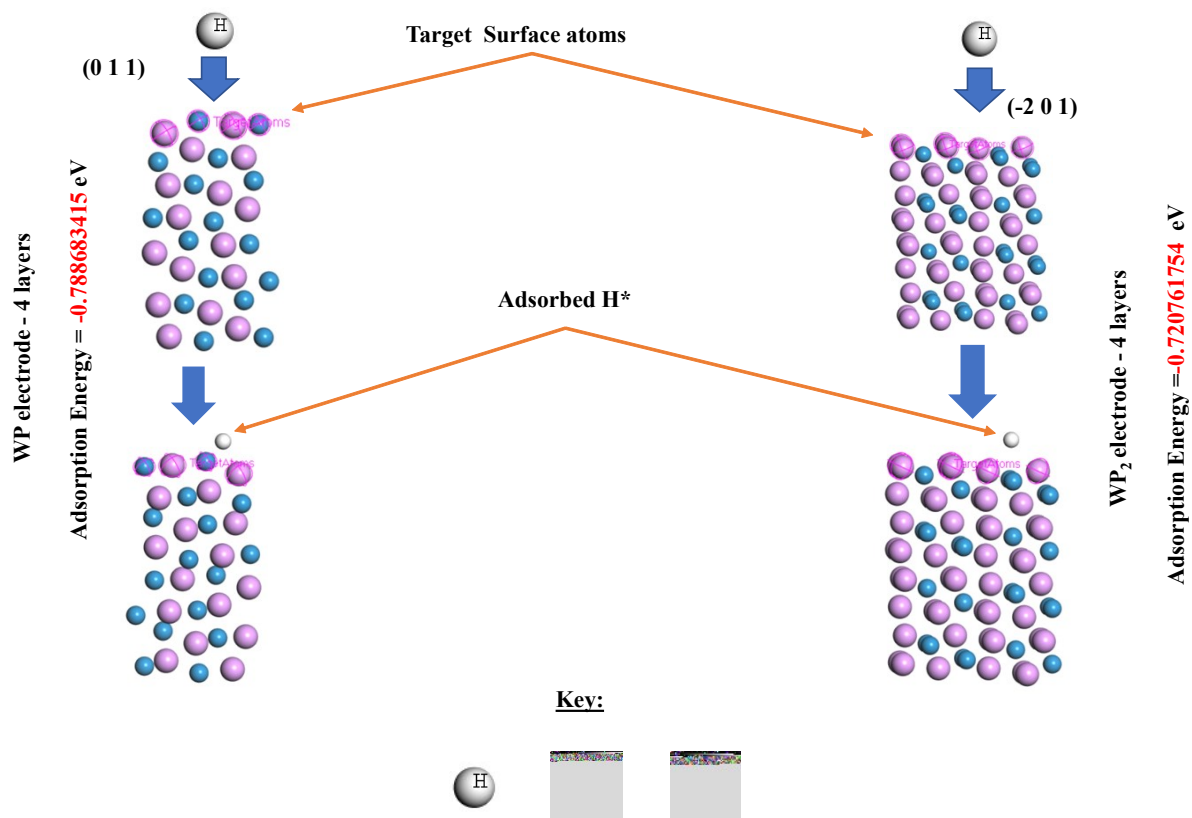

Figure S12: Calculated hydrogen adsorption energies for WP and  $\alpha$ -WP<sub>2</sub> using 4-layers.

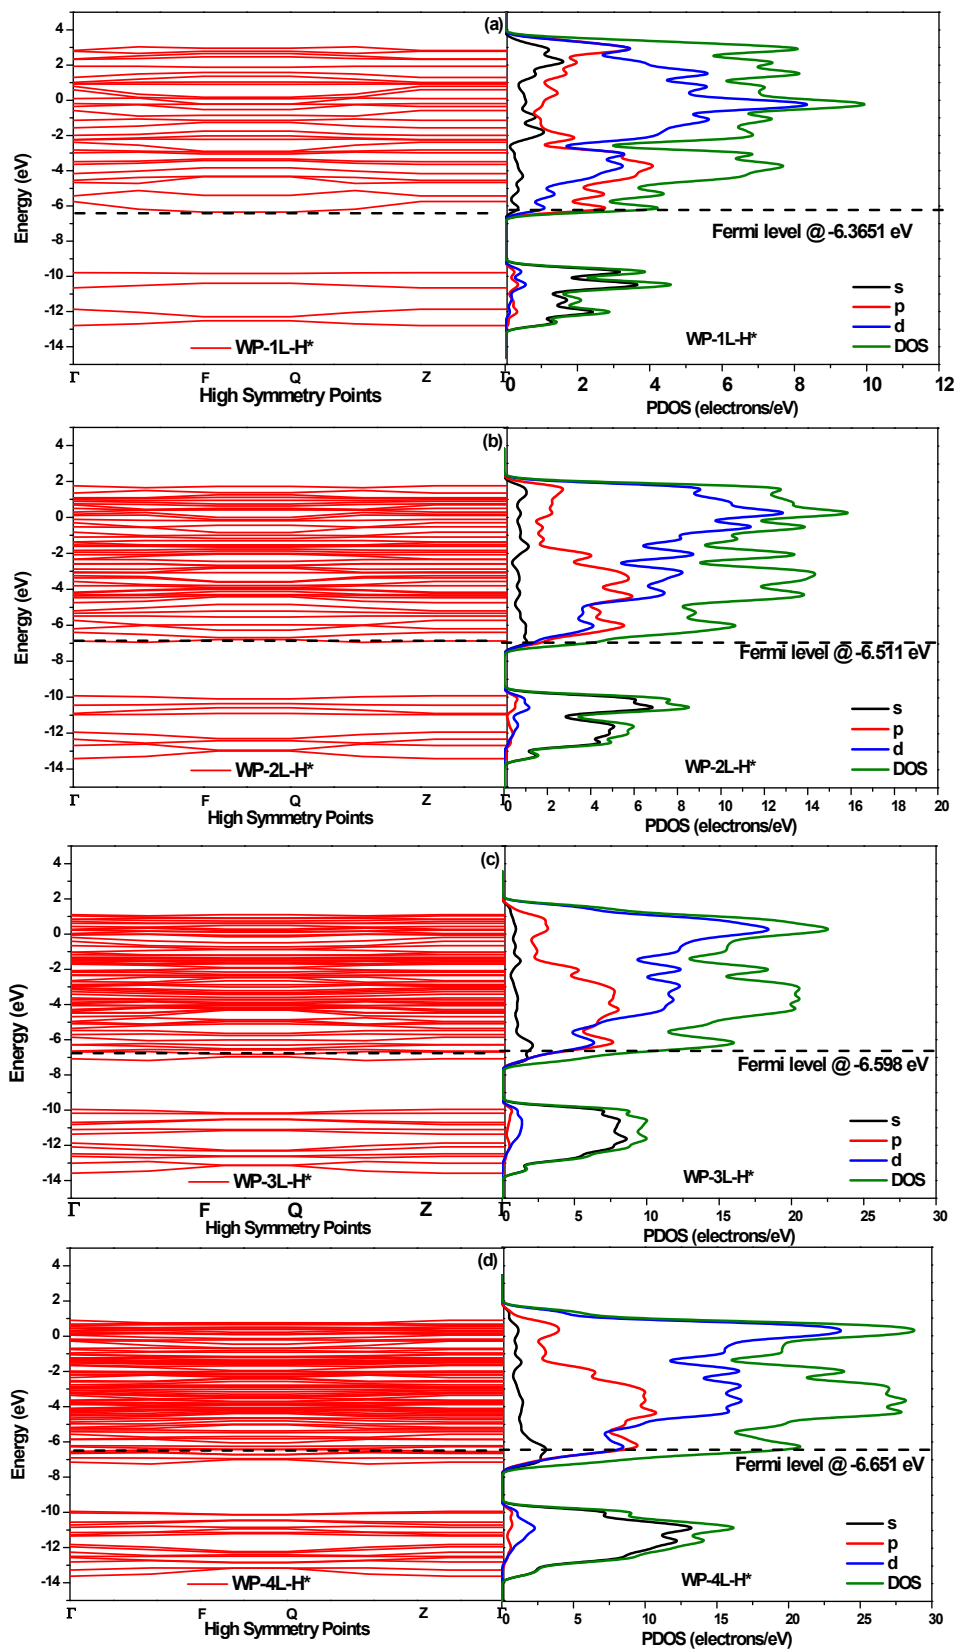

**Figure S13: Band structures and DOS plots calculated using (a) 1, (b) 2, (c) 3 and (d) 4 layer planes of the WP (011) surface.**

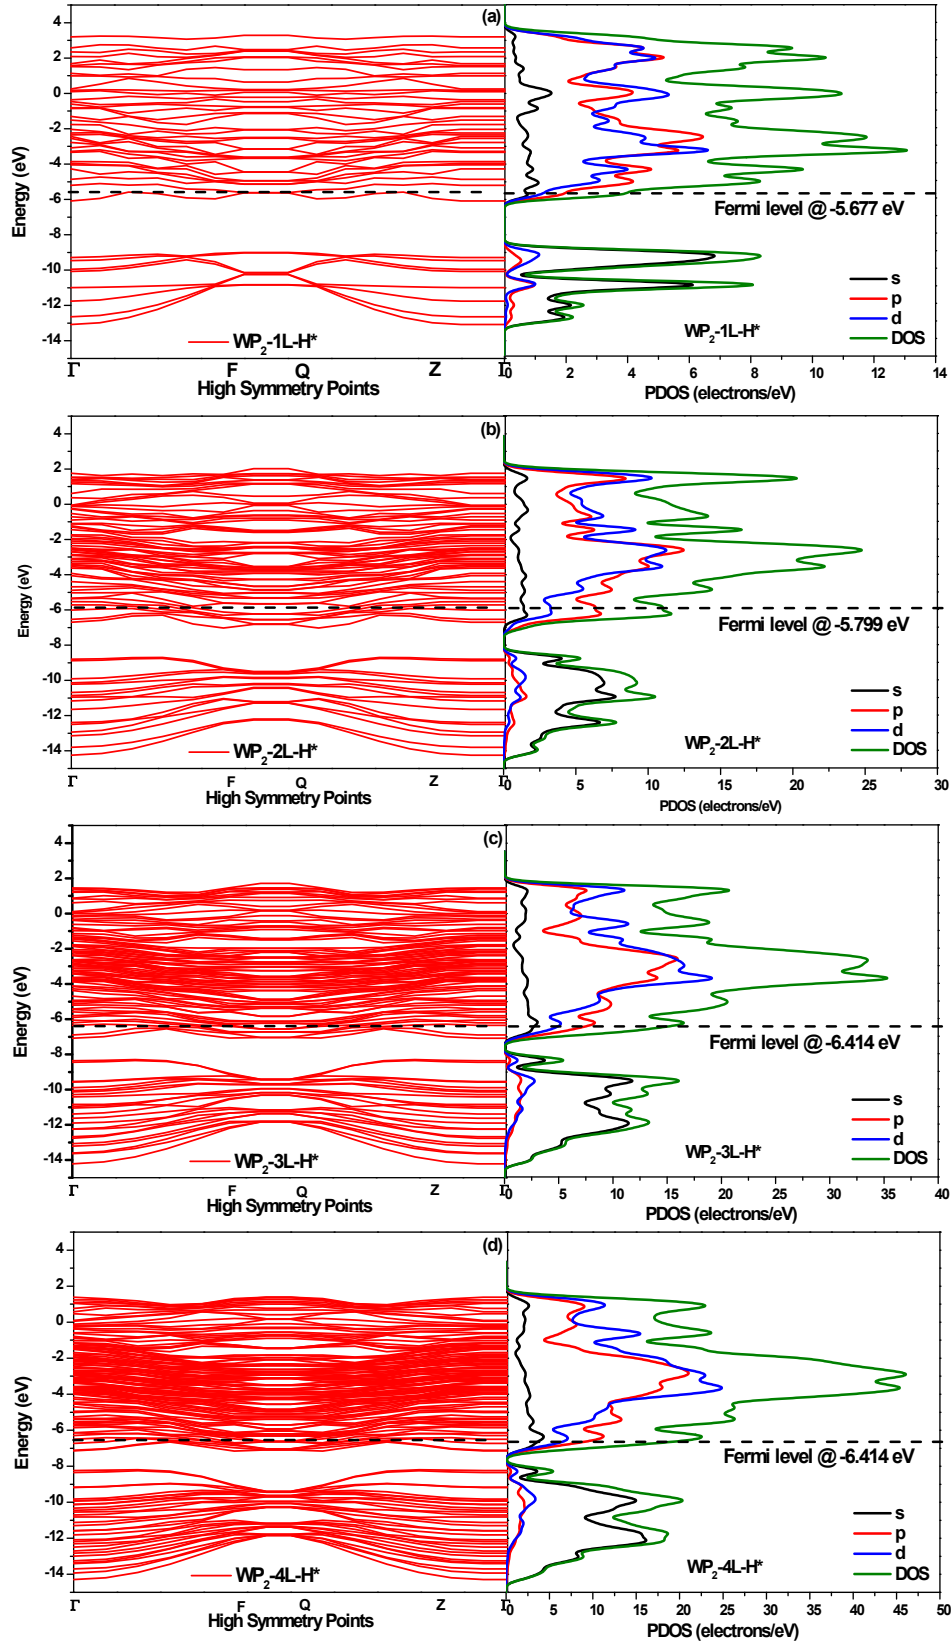

Figure S14: Band structures and DOS plots calculated using (a) 1, (b) 2, (c) 3 and (d) 4 layer planes of the  $\alpha$ - $\text{WP}_2$  (-201) surface.

## References

1. D. Naveh, E. Towe, Tunable band gaps in bilayer transition-metal dichalcogenides, *Physical Review* 84 (2011) 205325.
2. S. Ahmad, S. Mukherjee, A comparative study of electronic properties of bulk MoS<sub>2</sub> and its monolayer using DFT technique: Application of mechanical strain on MoS<sub>2</sub> monolayer, *Graphene* 3 (2014) 52-59.
